# Supplementary material for: Dual interfacial modification engineering with p-type NiO nanocrystals for preparing efficient planar perovskite solar cells
Source: Royal Society of Chemistry journal article supplement (doi:10.1039/c8tc04475a), 2018-01-01
Supplement: c8tc04475a1.pdf [file c8tc04475a1.pdf]

## Electronic Supplementary Information

### Dual interfacial modification engineering with p-type NiO nanocrystals for preparing efficient planar perovskite solar cells

Weina Zhang, Jing Song, Deng Wang, Kaiming Deng, Jihuai Wu, Zhang Lan\*

Engineering Research Center of Environment-Friendly Functional Materials, Ministry of Education; Fujian Key Laboratory of Photoelectric Functional Materials; College of Materials Science & Engineering, Huaqiao University, Xiamen 361021, China.

\*Author Correspondence: [lanzhang@hqu.edu.cn](mailto:lanzhang@hqu.edu.cn)

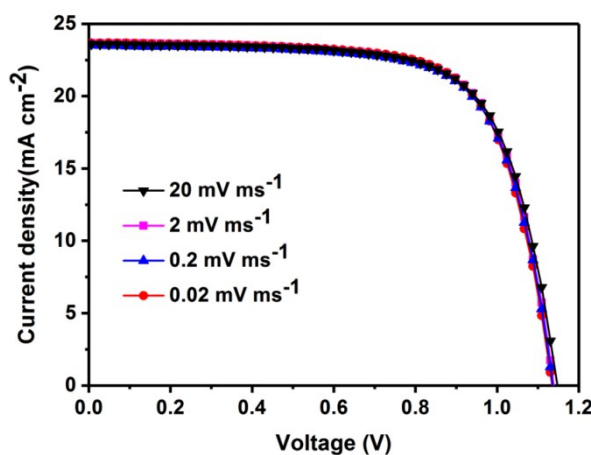

**Fig. S1.** J-V curves by reverse scan with different rates from 0.02 to 20 mV ms<sup>-1</sup>.

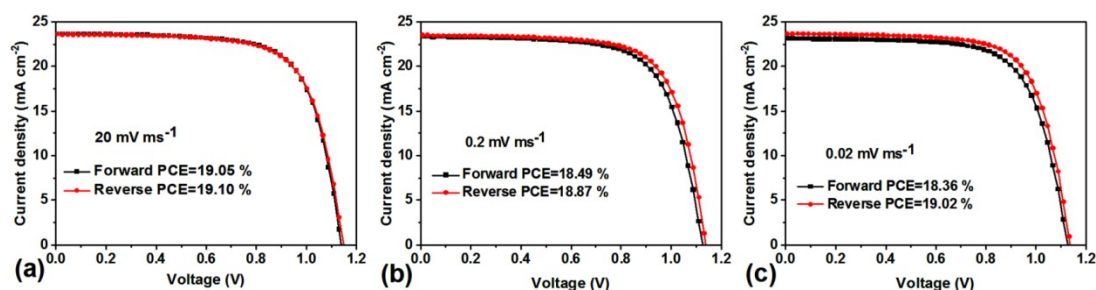

**Fig. S2.** J-V curves by forward and reverse scans with different rates from 0.02 to 20 mV ms<sup>-1</sup> (the data with 2 mV ms<sup>-1</sup> are presented in Fig. 7a in the paper).
